# Supplementary material
Source: Springer Nature journal article supplement (https://www.springermedizin.de/resource/supplementary/12889_2010_2773_MOESM1_ESM.pdf/9488770)
Supplement: MOESM1 [file 9488770]

$$\text{DALY} = \text{YLL} + \text{YLD}$$

$$\text{YLL} = \text{death} \times \text{life expectancy}$$

$$\text{YLD} = \text{incidence} \times \text{DW} \times \text{duration}$$

| mortality data        | main data source | data source for adjustment |
|-----------------------|------------------|----------------------------|
| number of deaths      | VR               | SPC                        |
| causes of death (COD) | VR               | VA                         |

| morbidity data           | main data sources on incidence or prevalence | data source for adjustment  |
|--------------------------|----------------------------------------------|-----------------------------|
| communicable diseases    | Disease Notification(3 years average)        | Health Welfare Survey (HWS) |
| non-communicable disease | Health Examination Survey (HES)              | -                           |
|                          | hospital admission data                      | HWS                         |
|                          | HWS                                          | -                           |
| injury                   | disease registry                             | -                           |
|                          | hospital admission data                      | HWS                         |
